# Supplementary material for: Mapping QTL For Seedling Morphological and Physiological Traits Under Normal and Salt Treatments&nbsp;in a RIL Wheat Population
Source: Research Square preprint supplement (doi:10.21203/rs.3.rs-183169/v1), 2021-02-12
Supplement: Supplementary file 1 [file a68b70a53ff72c1b251470d8.xlsx]

## Sheet: Sheet1
Table S2 Correlation analysis among three trials in ZX RIL population
TraitName	CK1/CK2	CK1/CK3	CK2/CK3	S1/S2	S1/S3	S2/S3
SH	0.6093***	0.5962***	0.6953***	0.3949***	0.3829***	0.4385***
TN	0.5398***	0.4909***	0.5511***	0.4457***	0.4957***	0.4345***
LN	0.5503***	0.5246***	0.6176***	0.3771***	0.4138***	0.5035***
YN	0.5297***	0.4224***	0.6756***	0.1569*	0.3143***	0.3627***
SPAD	0.4621***	0.4532***	0.6208***	0.3125***	0.3727***	0.4405***
RL	0.6385***	0.6088***	0.6898***	0.4179***	0.3574***	0.2855***
SFW	0.4625***	0.4977***	0.5546***	0.4248***	0.4070***	0.4504***
SDW	0.4801***	0.5150***	0.5024***	0.4055***	0.3675***	0.4118***
SWC	0.3534***	0.4977***	0.4129***	0.3845***	0.1860**	0.3240***
RDW	0.3909***	0.2953***	0.3902***	0.4707***	0.3885***	0.4184***
TDW	0.4655***	0.4787***	0.4888***	0.4186***	0.3716***	0.4117***
sK	0.2691***	0.3121***	0.2562***	0.1896**	0.2040**	0.3820***
sNa	-0.0133ns	-0.0414ns	0.1775**	0.2677***	0.2497***	0.2268***
sK/Na	0.0455ns	-0.0014ns	0.3239***	0.2400***	0.2665***	0.2897***
