# Supplementary material for: Mapping QTL For Seedling Morphological and Physiological Traits Under Normal and Salt Treatments&nbsp;in a RIL Wheat Population
Source: Research Square preprint supplement (doi:10.21203/rs.3.rs-183169/v1), 2021-02-12
Supplement: Supplementary file 2 [file e5636f32b2c2cd2eb5410145.xlsx]

## Sheet: Sheet1
Table S7 Possible candidate genes in three important QTL intervals based on the wheat reference genome (IWGSC RefSeq v1.0)
QTL	Gene ID	Chr.	Start	End	Description
QSpad-1A	TraesCS1A01G045100.1	1A	25806822	25807733	F-box family protein
	TraesCS1A01G045300.2	1A	26959347	26959400	Dual specificity phosphatase
	TraesCS1A01G045700.1	1A	27249177	27249528	Glutathione S-transferase
	TraesCS1A01G047000.1	1A	28757482	28758060	Calcium-transporting ATPase
	TraesCS1A01G047200.1	1A	29187273	29187392	Potassium transporter
	TraesCS1A01G047200.2	1A	29187273	29187392	Potassium transporter
	TraesCS1A01G047200.3	1A	29187607	29187609	Potassium transporter
	TraesCS1A01G047300.1	1A	29241345	29241959	Cytochrome P450 family protein, expressed
	TraesCS1A01G048700.1	1A	30196854	30196969	Non-specific lipid-transfer protein-like protein
	TraesCS1A01G048900.1	1A	30294397	30295059	H -ATPase 3
	TraesCS1A01G049200.1	1A	30787033	30787626	NADH dehydrogenase subunit 2
	TraesCS1A01G049400.1	1A	30880179	30881003	vacuolar protein sorting-associated protein, putative (DUF1162)
QRl-2B.1	TraesCS2A01G120100.1	2A	70283406	70283711	Photosystem II reaction center protein M
	TraesCS2B01G000900.1	2B	448223	448357	Voltage-dependent calcium channel subunit alpha-2/delta-1
	TraesCS2B01G002800.1	2B	1749669	1750706	Sulfotransferase
	TraesCS2B01G003100.1	2B	1764833	1765008	Sulfotransferase
	TraesCS2B01G004300.1	2B	2335867	2335933	Defensin
	TraesCS2B01G009800.1	2B	5596473	5596765	Fatty acyl-CoA reductase 2
	TraesCS2B01G010500.1	2B	5684865	5685084	WRKY transcription factor
	TraesCS2B01G016200.1	2B	7661710	7662105	Vacuolar protein sorting-associated protein 26
	TraesCS2B01G016900.1	2B	7837463	7839019	FAD-binding Berberine family protein
	TraesCS2B01G017300.1	2B	8069953	8070180	FAD-binding Berberine family protein, putative
	TraesCS2B01G020800.1	2B	10076810	10077377	F-box domain containing protein
	TraesCS2B01G023500.1	2B	10991458	10991682	Reductase 1
	TraesCS2B01G023800.1	2B	11076085	11077866	Ethylene receptor
	TraesCS2B01G033900.1	2B	16334252	16334425	Jasmonate-induced protein
	TraesCS2B01G034400.1	2B	16828866	16828971	Defensin
	TraesCS2B01G034500.1	2B	16847680	16847776	Defensin
	TraesCS2B01G036500.1	2B	17368088	17368495	Vesicle-associated 1-1-like protein
QTn-5B	TraesCS5B01G224000.1	5B	399226181	399227440	WRKY transcription factor
	TraesCS5B01G224100.1	5B	399274433	399275737	WRKY transcription factor
	TraesCS5B01G224200.1	5B	399297770	399301054	Basic helix-loop-helix transcription factor
	TraesCS5B01G225600.1	5B	401073468	401074124	Gibberellin-regulated family protein
	TraesCS5B01G227400.1	5B	403855456	403856624	ERD (early-responsive to dehydration stress) family protein
	TraesCS5B01G231700.1	5B	408437145	408456471	Potassium transporter
	TraesCS5B01G231800.1	5B	408955255	408961381	Potassium transporter
	TraesCS5B01G236900.1	5B	417885842	417886836	Ethylene-responsive transcription factor
	TraesCS5B01G237500.1	5B	418471990	418472541	Calcium-binding protein
	TraesCS5B01G237600.1	5B	418509372	418509925	Calmodulin
	TraesCS5B01G237700.1	5B	418549820	418550285	Calcium-binding protein
	TraesCS5B01G238300.1	5B	419242629	419245716	Fatty acyl-CoA reductase
